# Supplementary material
Source: Research Square preprint supplement (doi:10.21203/rs.3.rs-9296720/v1)
Supplement: Supplementary file 1 [file 32c6105588369b6c963f3176.docx]

### **Appendix 1: Interview Form**

## **Interview Information**

| Field | Details |
| --- | --- |
| Interview ID | [To be completed by researcher] |
| Date | [DD/MM/YYYY] |
| Location | [Country/City] |
| Interviewer | [Name] |
| Duration | [Minutes] |
| Recording Reference | [File name/number] |
| Transcription Status | [ ] Completed [ ] Pending |

## **Participant Demographics**

| Field | Response |
| --- | --- |
| Gender | [ ] Female [ ] Male [ ] Prefer not to say |
| Age | [ ] 21–30 [ ] 31–40 [ ] 41–50 [ ] 51+ |
| Highest Education Level | [ ] Bachelor's [ ] Master's [ ] Doctoral [ ] Other: _____ |
| Professional Role | [ ] Environmental educator [ ] NGO representative [ ] School educator [ ] University faculty [ ] Program coordinator [ ] Policymaker [ ] Curriculum developer [ ] Other: _____ |
| Organizational Affiliation | [ ] NGO/Civil Society [ ] School/K–12 [ ] University/Higher Education [ ] Community-Based Organization [ ] Government Agency [ ] Other: _____ |
| Years of Experience in OE | [ ] <5 [ ] 5–10 [ ] 11–20 [ ] 21+ |
| Country/Region | _________________________________ |

## **Introduction to Participant**

Thank you for agreeing to participate in this research on environmental educator initiatives promoting outdoor education in the Middle East. This study aims to understand the diverse approaches, challenges, and enabling factors shaping OE across the region. Your insights will contribute to a deeper understanding of how educators are advancing outdoor learning in varied contexts.

Your participation is voluntary, and all responses will be anonymized. The interview will take approximately 60–90 minutes. You may decline to answer any question or withdraw at any time without consequence.

Do you have any questions before we begin? [Obtain verbal consent and confirm signed consent form received]

### **Section 1: Background and Professional Context**

1.1. Can you please describe your current role and how you became involved in environmental education and outdoor education?

1.2. What does outdoor education mean to you in your specific context? How would you define or describe it?

1.3. How long have you been involved in OE initiatives, and what motivated you to pursue this work?

1.4. What training or preparation have you received specifically related to outdoor education and environmental pedagogy?

### **Section 2: Initiative Overview and Program Characteristics**

2.1. Please describe the outdoor education initiative(s) you are currently involved in.

- What are the main goals and objectives?
- Who is the target audience (age groups, backgrounds)?
- How long has this initiative been operating?
- Where does the initiative take place (settings, locations)?

2.2. How would you describe the scale and scope of your initiative?

- [ ] Local/Community-level
- [ ] Regional
- [ ] National
- [ ] Multi-country
- [ ] Other: ____________

2.3. What types of activities or learning experiences does your initiative offer?

2.4. How would you describe the pedagogical approach or educational philosophy underlying your initiative?

2.5. Are there specific educational frameworks that guide your work (e.g., Experiential Learning, Place-Based Education, Education for Sustainable Development)? Please elaborate.

### **Section 3: Pedagogical Strategies and Practices**

3.1. Can you describe a typical outdoor learning session or program in your initiative?

3.2. How do you adapt your teaching approaches to the specific environmental conditions in your region (e.g., climate, seasonality, landscape)?

3.3. In what ways do you incorporate local ecological knowledge, cultural traditions, or community practices into your programs?

3.4. How do you assess or evaluate learning outcomes in your initiative? What methods do you use to understand participant engagement and development?

3.5. How do you address the emotional and affective dimensions of learning about environmental issues? Do you encounter eco-emotions (e.g., eco-anxiety, concern) among participants? How do you respond?

### **Section 4: Institutional and Organizational Context**

4.1. How would you describe the relationship between your initiative and formal education systems (schools, universities) in your context?

4.2. Does your initiative operate within, alongside, or outside formal educational structures? Please explain.

4.3. What institutional support exists for your work (e.g., from schools, universities, government agencies, NGOs)?

4.4. How do you navigate bureaucratic or administrative constraints that may affect your programming?

4.5. Do you collaborate with other organizations, institutions, or networks? If so, how do these partnerships support your work?

### **Section 5: Socio-Cultural Dimensions**

5.1. How are outdoor education and nature-based learning perceived by the communities you work with? Are there cultural attitudes or beliefs that influence participation?

5.2. How do you address gender-related considerations in your programming? Are there differences in access or participation based on gender?

5.3. What strategies do you use to ensure inclusivity and accessibility for diverse participants (e.g., economic background, ability, geographic location)?

5.4. In what ways do you engage families, local communities, or other stakeholders in your initiatives?

5.5. How do you integrate local traditions, heritage, or indigenous knowledge into your educational approach?

### **Section 6: Barriers and Challenges**

6.1. What are the most significant challenges you face in implementing and sustaining your outdoor education initiatives?

6.2. How do environmental conditions (e.g., extreme heat, aridity, seasonal factors) affect your programming?

6.3. What institutional or policy-related barriers have you encountered?

6.4. How do resource constraints (e.g., funding, equipment, materials, transportation) impact your work?

6.5. Have you faced challenges related to safety, liability, or risk management in outdoor settings? How have you addressed these?

6.6. In contexts affected by conflict, instability, or political constraints, how has this influenced your ability to conduct OE activities?

### **Section 7: Enabling Factors and Successes**

7.1. What factors have enabled your initiative to succeed or grow?

7.2. What resources (human, financial, material, institutional) have been most valuable to your work?

7.3. Have you benefited from supportive policies, leadership, or networks? Please describe.

7.4. What personal or professional qualities have been most important to your effectiveness as an environmental educator?

7.5. Can you share a story or example of a particularly meaningful outcome or impact from your work?

### **Section 8: Professional Development and Capacity Building**

8.1. What opportunities for professional development or training have been available to you in OE?

8.2. What gaps in training or capacity do you perceive in your context?

8.3. What would strengthen the professional capacity of environmental educators in your region?

8.4. Are you part of any professional networks, communities of practice, or regional collaborations related to OE? How do these support your work?

### **Section 9: Sustainability and Scaling**

9.1. How do you envision the long-term sustainability of your initiative?

9.2. What would be needed to scale your initiative to reach more participants or expand to other contexts?

9.3. How could OE be better integrated into formal education systems in your country?

9.4. What role should government, NGOs, universities, and other stakeholders play in advancing OE?

9.5. Do you see opportunities for greater regional collaboration on OE across Middle Eastern countries?

### **Section 10: Vision and Recommendations**

10.1. What do you see as the most promising directions for outdoor education in the Middle East?

10.2. If you could change one thing in your context to better support OE, what would it be?

10.3. What advice would you offer to educators starting new OE initiatives in similar contexts?

10.4. What do policymakers and educational leaders need to understand about the value of outdoor education?

10.5. Is there anything else you would like to share about your experiences, insights, or reflections that we haven't discussed?

## **Post-Interview Notes**

| Field | Notes |
| --- | --- |
| Key Themes Identified |  |
| Follow-up Needed |  |
| Observations/Reflections |  |

## **Document Review Checklist**

Please indicate any documents or materials provided or referenced:

| Document Type | Received | Notes |
| --- | --- | --- |
| Program descriptions/materials | [ ] |  |
| Curriculum documents | [ ] |  |
| Evaluation reports | [ ] |  |
| Policy documents | [ ] |  |
| Training materials | [ ] |  |
| Photos/videos (with consent) | [ ] |  |
| Other: ________________ | [ ] |  |

## **Confirmation of Consent**

I confirm that:

- [ ] I have explained the purpose of this research to the participant
- [ ] The participant has had the opportunity to ask questions
- [ ] The participant has signed the written informed consent form
- [ ] The participant understands that they can withdraw at any time
- [ ] I have maintained confidentiality of participant information

Interviewer Signature: ______________________________

Date: ______________________________

## **For Researcher Use Only**

| Data Processing | Status |
| --- | --- |
| Transcription completed | [ ] |
| Audio file securely stored | [ ] |
| Consent form filed | [ ] |
| Data anonymized | [ ] |
| Entered into analysis software | [ ] |
| Initial coding completed | [ ] |
| Member check conducted | [ ] |

### **Notes on Data Quality and Context**

* This interview form was developed for the study "Environmental Educator Initiatives to Promote Outdoor Education in the Middle East" (Ethics Approval: *2026/ETH15897474*).
